# Supplementary material
Source: Elsevier journal article supplement (https://www.sciencedirect.com/science/article/pii/S030089322400023X)
Supplement: mmc1 [file mmc1.pdf]

## MATERIAL ADICIONAL

**Tabla 1 del material adicional**

Aspectos clave de los diferentes fármacos para el tratamiento de la sobrecarga hidrosalina

| Fármaco                  | Mecanismo de acción                                                        | Farmacocinética                                                                                                                                                     | Dosis                                                       | Pros/Contras                                                                                                                                                                                                                                     |
|--------------------------|----------------------------------------------------------------------------|---------------------------------------------------------------------------------------------------------------------------------------------------------------------|-------------------------------------------------------------|--------------------------------------------------------------------------------------------------------------------------------------------------------------------------------------------------------------------------------------------------|
| <i>Diuréticos de asa</i> |                                                                            |                                                                                                                                                                     |                                                             |                                                                                                                                                                                                                                                  |
| Furosemida               | Inhibe el cotransportador NaKCC2 en la porción ascendente del asa de Henle | BO: 10-100%<br>UPP: 91-99%<br>Vida media: 0,5-2 h (FR normal)/9,7 h (ERCA)<br>Inicio de acción: 0,5-1 h v.o./5-10 min i.v./0,5 h s.c.<br>Duración del efecto: 6-8 h | Inicial: 20-40 mg v.o./40-240 mg i.v.<br>Máxima: 400-600 mg | Único diurético de asa con presentación i.v.<br>Secreción tubular proximal<br>BO altamente variable<br>Retención de Na posdiurético especialmente distal<br>Umbral diurético: la dosis administrada debe exceder cierto umbral para ser efectiva |

|            |                                                                            |                                                                                                                                           |                                                                          |                                                                                                            |
|------------|----------------------------------------------------------------------------|-------------------------------------------------------------------------------------------------------------------------------------------|--------------------------------------------------------------------------|------------------------------------------------------------------------------------------------------------|
| Torasemida | Inhibe el cotransportador NaKCC2 en la porción ascendente del asa de Henle | BO: 80-100%<br>UPP: > 99%<br>Vida media: 3-4 h (FR normal). No cambia en ERCA<br>Inicio de acción: 0,5-1 h<br>Duración del efecto: 6-16 h | Inicial: 5-10 mg<br>Máxima: 200-300 mg                                   | Torasemida 10 mg es equivalente a furosemida 20-40 mg<br>BO elevada<br>Vida media más larga que furosemida |
| Bumetanida | Inhibe el cotransportador NaKCC2 en la porción ascendente del asa de Henle | BO: 80-100%<br>UPP: 92-99%<br>Vida media: 1-1,5 h (FR normal). No cambia en ERCA<br>Inicio de acción: 0,5-1 h<br>Duración del efecto: 4-6 | Inicial: 1-2 mg v.o. o i.v./24 h<br>Dosis máxima: 10 mg v.o. o i.v./24 h | Bumetanida 1 mg es equivalente a 40 mg de furosemida<br>Buena BO<br>Vida media larga                       |

|                              |                                                    |                                                                              |                                                                                                                                                                                                                  |                                                                                                              |
|------------------------------|----------------------------------------------------|------------------------------------------------------------------------------|------------------------------------------------------------------------------------------------------------------------------------------------------------------------------------------------------------------|--------------------------------------------------------------------------------------------------------------|
|                              |                                                    | h                                                                            |                                                                                                                                                                                                                  |                                                                                                              |
| <i>Diuréticos tiacídicos</i> |                                                    |                                                                              |                                                                                                                                                                                                                  |                                                                                                              |
| Hidroclorotiacida            | Bloquea el cotransportador Na/Cl del túbulo distal | BO: 65-75%<br>UPP: 40-68%<br>Vida media: 6-15 h<br>Inicio de acción: 1-2,5 h | Ajustar según la función renal <sup>1,2</sup> : > 50 ml/min/1,73 m <sup>2</sup> : 25 mg/día; 20-50 ml/min/1,73 m <sup>2</sup> : 50 mg/día, y < 20 ml/min/1,73 m <sup>2</sup> : 100 mg/día)<br>Máxima: 200 mg/día | Disminuye la retención de Na distal de los diuréticos de asa<br>Mayor riesgo de hiponatremia e hipopotasemia |
| Clortalidona                 | Bloquea el cotransportador Na/Cl del túbulo distal | BO: 64%<br>UPP: 50-76%<br>Vida media: 45-60 h<br>Inicio de acción: 8 h       | Inicial: 25 mg<br>Máxima: 100 mg                                                                                                                                                                                 | Se une a los glóbulos rojos<br>Puede precipitar, ataques de gota<br>No se modifica con la función renal      |

|                                                        |                                                                                   |                                                                             |                                                                                        |                                                                                                                            |
|--------------------------------------------------------|-----------------------------------------------------------------------------------|-----------------------------------------------------------------------------|----------------------------------------------------------------------------------------|----------------------------------------------------------------------------------------------------------------------------|
| Metolazona                                             | Bloquea el cotransportador Na/Cl del túbulo distal                                | BO: 70-80%<br>UPP: 95%<br>Vida media: 12-24 h<br>Inicio de acción: 1-2 h    | Inicial: 2,5-5 mg v.o./día<br>Máxima: 20 mg v.o./día en 1-2 tomas                      |                                                                                                                            |
| <i>Inhibidores del cotransportador sodio-glucosa 2</i> |                                                                                   |                                                                             |                                                                                        |                                                                                                                            |
| Dapaglifozina, empaglifozina y canaglifozina           | Inhibidor selectivo y reversible del cotransportador sodio-glucosa 2              | BO: 78%<br>UPP: 91%<br>Vida media: 12,9 h<br>Inicio de acción 2 h           | Dosis recomendada: 10 mg (dapaglifozina y empaglifozina)<br>100-300 mg (canaglifozina) | Descongestión tisular sin afectar el tono vascular<br>Seguros en pacientes con ICA<br>Escaso efecto hipoglucemiante en ERC |
| <i>Otros diuréticos</i>                                |                                                                                   |                                                                             |                                                                                        |                                                                                                                            |
| Acetazolamida                                          | Inhibidor de la anhidrasa carbónica en el túbulo contorneado proximal. Incrementa | BO: 80-100%<br>UPP: > 90%<br>Vida media: 2,4-5,4 h<br>Inicio de acción: 1 h | Inicial: 250-375 mg (v.o. o i.v.)<br>Máxima: 500 mg (v.o. o i.v.)                      | Preferiblemente en ayunas<br>La evidencia en ICA es por vía i.v., se precisa de preparación magistral en farmacia.         |

|                 |                                                                                                                         |                                                                        |                                                                               |                                                                                                                               |
|-----------------|-------------------------------------------------------------------------------------------------------------------------|------------------------------------------------------------------------|-------------------------------------------------------------------------------|-------------------------------------------------------------------------------------------------------------------------------|
|                 | la natriuresis y la excreción de bicarbonato                                                                            | (v.o.)/15-60 min (i.v.)                                                |                                                                               | Útil en alcalosis metabólica hipoclorémica<br>Vigilar potasio, pH.<br>Contraindicada en glaucoma de ángulo cerrado            |
| Espironolactona | Bloqueo de la unión de aldosterona a sus receptores en túbulo contorneado distal.<br>Inhibe la reabsorción sodio y agua | BO: 60-90%<br>UPP: 90%<br>Vida media 16 h<br>Inicio de acción: 48-72 h | Efecto diurético: 100 mg/día<br>ICFEr: Inicio 25 mg → 50 mg/día               | Diurético ahorrador de potasio<br>Incremento de la vida media en pacientes con ERC<br>Disminución de morbimortalidad en ICFEr |
| Tolvaptán       | Antagonista receptor V2 de la vasopresina en túbulo colector renal. Incrementa la                                       | BO: 40-56%<br>UPP: > 98%<br>Vida media 21 h<br>Inicio de acción: 2-4 h | 15 mg/día → 30 mg/día → 60 mg/día<br>Valorar ingesta agua libre. Plantear 7,5 | Mejoría congestión en ICA.<br>Beneficio pronóstico IC + hiponatremia<br>Menor porcentaje de                                   |

|      |                                                                                        |                              |                                                                                                                                                                                |                                                                                                                 |
|------|----------------------------------------------------------------------------------------|------------------------------|--------------------------------------------------------------------------------------------------------------------------------------------------------------------------------|-----------------------------------------------------------------------------------------------------------------|
|      | excreción de agua libre                                                                | Metabolismo hepático         | mg/día si uso<br>concomitante de otros<br>diuréticos<br>Vigilar natremia, evitar<br>aumento de $\geq 12$<br>mmol/l en 24 h. No usar<br>ante imposibilidad de<br>percibir «sed» | empeoramiento de la función<br>renal<br>Uso hospitalario<br>Alto coste<br>Toxicidad hepática con dosis<br>altas |
| Urea | Induce una diuresis<br>osmótica al aumentar<br>la osmolaridad<br>plasmática y urinaria | BO: > 90%<br>Vida media: 1 h | Inicio: 15-30 g/día en 1-<br>2 tomas<br>Máxima: 45 g/día                                                                                                                       | Se excreta inalterada por la<br>orina, evitar si FGE < 30<br>ml/min/1,73 m <sup>2</sup>                         |

BO: biodisponibilidad oral; Cl: cloro; ERC: enfermedad renal crónica; ERCA: enfermedad renal crónica avanzada; FGE: filtrado glomerular estimado; FR: función renal; IC: insuficiencia cardiaca; ICA: insuficiencia cardiaca aguda; i.v.: vía intravenosa; ICFer: insuficiencia cardiaca con fracción de eyección reducida; Na: sodio; NaKCC2; cotransportador sodio, potasio, dos cloros; s.c.: vía subcutánea; UPP: unión a proteínas plasmáticas; v.o.: avía oral.

## Tabla 2 del material adicional

Características de los principales vasodilatadores e inótrpos/vasopresores empleados en la insuficiencia cardiaca aguda

| Fármacos vasodilatadores       | Dosis                                                                                          | Efectos secundarios principales                                             |
|--------------------------------|------------------------------------------------------------------------------------------------|-----------------------------------------------------------------------------|
| Nitroglicerina                 | Inicio: 10-20 $\mu\text{g}/\text{min}$<br>Máximo 200 $\mu\text{g}/\text{min}$                  | Hipotensión, cefalea                                                        |
| Mononitrato de isosorbida      | Inicio: 1 mg/h<br>Máximo: 10 mg/h                                                              | Hipotensión, cefalea                                                        |
| Nitroprusiato                  | Inicio: 0,3 $\mu\text{g}/\text{kg}/\text{min}$<br>Máximo: 5 $\mu\text{g}/\text{kg}/\text{min}$ | Hipotensión, toxicidad isocianato                                           |
| Fármacos inótrpos/vasopresores | Dosis                                                                                          | Efectos                                                                     |
| Dobutamina                     | Desde 2 a 20 $\mu\text{g}/\text{kg}/\text{min}$                                                | Selectivo sobre receptores $\beta_1$<br>Inótrpo +++<br>Poco efecto sobre TA |
| Dopamina                       | Intermedia ( $\beta$ ): 5 a 15 $\mu\text{g}/\text{kg}/\text{min}$                              | Intermedia: efecto inótrpo ( $\beta+$ )                                     |

|               |                                                               |                                                                                                         |
|---------------|---------------------------------------------------------------|---------------------------------------------------------------------------------------------------------|
|               | Alta ( $\alpha$ ): 15 a 40 $\mu\text{g}/\text{kg}/\text{min}$ | Dosis alta: efecto $\beta+$ y $\alpha+$ (vasopresor).<br>Vasopresor potente                             |
| Noradrenalina | Desde 0,01 a 1 $\mu\text{g}/\text{kg}/\text{min}$             | Simpaticomimético con principal acción $\alpha$ y menor $\beta_1$<br>Vasoconstrictor periférico intenso |
| Levosimendán  | Desde 0,05 a 0,2 $\mu\text{g}/\text{kg}/\text{min}$           | Inodilatador<br>Puede provocar hipotensión arterial                                                     |



## **BIBLIOGRAFÍA**

1. Trullàs JC, Morales-Rull JL, Casado J, et al. Combining loop with thiazide diuretics for decompensated heart failure: the CLOROTIC trial. *Eur Heart J*. 2023;44:411-421.

2. Trullàs JC, Morales-Rull JL, Casado J, et al. Combining loop and thiazide diuretics for acute heart failure across the estimated glomerular filtration rate spectrum: A post-hoc analysis of the CLOROTIC trial. *Eur J Heart Fail*. 2023;25:1784-1793.
